# Supplementary material for: A Randomized, Placebo-Controlled Clinical Trial of Bamlanivimab and Etesevimab Together in High-Risk Ambulatory Patients With COVID-19 and Validation of the Prognostic Value of Persistently High Viral Load
Source: PubMed Central journal article supplement — Clin Infect Dis. 2021 Oct 28;75(1):e440–9. doi: 10.1093/cid/ciab912 (PMC9402688; doi:10.1093/cid/ciab912), 2021-10-28
Supplement: ciab912_suppl_supplementary_data.pdf [file ciab912_suppl_supplementary_data.pdf]

## SUPPLEMENTARY MATERIAL

1. Methods
  - Sample size
  - Dose justification
  - Inclusion and exclusion criteria
  - Sustained symptom resolution
  - RT-PCR & PHVL quantification
2. Results
  - Subgroup analyses of age and BMI
  - Time to sustained symptom resolution
  - Additional secondary outcomes
    - *Time to first symptom improvement*
    - *Time to first symptom resolution*
    - *Time to complete symptom resolution*
    - *Time to sustained complete symptom resolution*
    - *Time to viral clearance*
  - Treatment emergent adverse events present in two or more participants in total
3. BLAZE-1 investigators and support staff
4. Symptom questionnaire

### 1. METHODS

#### Sample size

A sample size of approximately 500 adult patients per treatment arm would provide >90% power to demonstrate if bamlanivimab and etesevimab together is statistically significantly better than placebo (defined as an odds ratio <1 in the proportion of patients experiencing COVID-related hospitalization or any-cause death). Treatment arm 9 of BLAZE-1 (700mg of bamlanivimab and 1400 mg etesevimab together) began enrolment after arm 7 (2800 mg of bamlanivimab and 2800 mg etesevimab together), therefore additional participants were enrolled in treatment arm 8 (placebo) to ensure at least a 33% increase in placebo participants and adequate placebo control for the primary comparison of treatment arms 8 and 9. Randomization was planned to be 1:2 (treatment arm 8 : treatment arm 9) allocation ratio. It was anticipated that the analyses for treatment arms 8 and 9 would utilize approximately 750 placebo patients in treatment arm 8 versus approximately 500 for treatment arm 9. This sample size justification was based on the primary endpoint which was

informed from available data on hospitalization or death events from the Phase 2 portion (a placebo event rate of 8.7% and a relative reduction of 60% for bamlanivimab and etesevimab). There was no set sample size for the adolescent patients.

### **Dose justification**

The 700 mg level of bamlanivimab was selected based on its confirmation as a saturating dose in the BLAZE-1 interim analysis based on viral load, symptoms, and clinical outcomes<sup>1</sup>. The 1400 mg level of etesevimab was selected as the maximum therapeutic dose based on an approximate 2-fold higher IC50 compared to bamlanivimab. This dose was expected to reduce viral load and have a sustained concentration above the respective IC90 of viral neutralization in 90% of the patient population for at least 28 days.

### **Inclusion Criteria**

Participants are eligible to be included in the study if all the following criteria apply:

#### *Age*

- Are ≥12 years of age at the time of screening

#### *Disease Characteristics*

- Are currently not hospitalized
- Have ≥ 1 mild or moderate COVID-19 symptoms, per the FDA resource page<sup>2</sup>:
  - i. Fever
  - ii. Cough
  - iii. Sore throat
  - iv. Malaise
  - v. Headache
  - vi. Muscle pain
  - vii. Gastrointestinal symptoms, or
  - viii. Shortness of breath with exertion
- Have sample collection for first positive SARS-CoV-2 viral infection determination ≤3 days prior to start of the infusion

#### *Sex*

- Are males or non-pregnant females, and any contraceptives used are consistent with local regulations for those participating in clinical studies

#### *Study Procedures*

- Understand and agree to comply with planned study procedures

- Agree to the collection of nasopharyngeal swabs and venous blood

#### *Informed Consent*

- The participant or legally authorized representative give signed informed consent and/or assent

#### *Are ≥18 years of age and satisfy at least one of the following at the time of screening*

- Are ≥ 65 years of age
- Have a BMI ≥ 35 (BMI is rounded to the nearest whole number, for example, 34.5 is rounded to 35)
- Have chronic kidney disease
- Have type 1 or type 2 diabetes
- Have immunosuppressive disease
- Are currently receiving immunosuppressive treatment, or
- Are ≥ 55 years of age and have
  - cardiovascular disease, or
  - hypertension, or
  - chronic obstructive pulmonary disease or other chronic respiratory disease

#### *Are 12-17 years of age (inclusive) and satisfy at least one of the following at the time of screening*

- Have a BMI ≥85th percentile for their age and gender based on CDC growth charts<sup>3</sup>
- Have sickle cell disease
- Have congenital or acquired heart disease
- Have neurodevelopmental disorders, for example, cerebral palsy
- Have a medical-related technological dependence, for example, tracheostomy, gastrostomy, or positive pressure ventilation (not related to COVID-19)
- Have asthma or reactive airway or other chronic respiratory disease that requires daily medication for control
- Have type 1 or type 2 diabetes
- Have chronic kidney disease
- Have immunosuppressive disease, or
- Are currently receiving immunosuppressive treatment

#### **Exclusion Criteria**

Participants are excluded from the study if any of the following criteria apply:

#### *Medical Conditions*

- Have SpO<sub>2</sub> ≤ 93% on room air at sea level or PaO<sub>2</sub>/FiO<sub>2</sub> < 300, respiratory rate ≥30 per minute, heart rate ≥125 per minute
- Require mechanical ventilation or anticipated impending need for mechanical ventilation
- Have known allergies to any of the components used in the formulation of the interventions
- Have hemodynamic instability requiring use of pressors within 24 hours of randomization
- Suspected or proven serious, active bacterial, fungal, viral, or other infection (besides

COVID-19) that in the opinion of the investigator could constitute a risk when taking intervention

- Have any co-morbidity requiring surgery within <7 days, or that is considered life threatening within 29 days
- Have any serious concomitant systemic disease, condition or disorder that, in the opinion of the investigator, should preclude participation in this study

#### *Other Exclusions*

- Have a history of a positive SARS-CoV-2 serology test
- Have a history of a positive SARS-CoV-2 test prior to the one serving as eligibility for this study
- Have received an investigational intervention for SARS-CoV-2 prophylaxis within 30 days before dosing
- Have received treatment with a SARS-CoV-2 specific monoclonal antibody
- Have received convalescent COVID-19 plasma treatment
- Have participated, within the last 30 days, in a clinical study involving an investigational intervention. If the previous investigational intervention has a long half-life, 5 half-lives or 30 days, whichever is longer, should have passed
- Are concurrently enrolled in any other type of medical research judged not to be scientifically or medically compatible with this study
- Are pregnant or breast feeding
- Are investigator site personnel directly affiliated with this study, and
- Have body weight <40 kg

#### **Sustained Symptom Resolution**

The key secondary endpoint, sustained symptom resolution, was defined as 2 consecutive assessments with a score of 0 for shortness of breath, feeling feverish, body aches and pains, sore throat, chills, and headache; and a score of 0 or 1 for fatigue or cough.

#### **RT-PCR**

Detection of SARS-CoV-2 was determined from nasopharyngeal swab followed by quantitative reverse transcriptase–polymerase chain reaction (RT-PCR). Sample collection, RNA extraction and RT-PCR were carried out as previously described.<sup>4</sup>

For qualitative endpoints including viral clearance and time to viral clearance, SARS-CoV-2 clearance was defined as 2 consecutive negative tests for SARS-CoV-2. The date of viral clearance was the earliest date of the 2 consecutive negative tests.

For quantitative endpoints including the change from baseline and area under the response viral load curve, the viral load was calculated based on the cycle threshold (Ct) values. The following were taken into account when determining the viral load

- Two Ct values were provided on two different genes: N1 and N2. N1 was used as the primary measure and N2 was only used when the Ct value for N1 was not available.
- Ct values ranged between 0 and 45.
- Negative SARS-CoV-2 tests were associated with a Ct value of 45.
- The ( $\log_{10}$ ) viral load was calculated from the Ct value  $(45 - Ct) / \log_2 10$ , or  $(45 - Ct) / 3.321928$ .

### **PHVL quantification**

PHVL quantification was calculated as previous described.<sup>5</sup> In brief, an additional normalization step was taken to reduce pre-analytical variability in the viral load measurements. As previously described, the N1 or N2 (if N1 was not available) Ct value for any positive sample was subtracted by the Ct value for the RNase P (RP) mRNA target for that sample minus 26.17:

$$\text{N1/N2 Ct value for a sample} - [(\text{corresponding RP Ct value for that sample}) - 26.17] = \text{Normalized N1/N2 Ct value.}$$

The correction factor of 26.17 is a historical average value of RP Ct for this assay and was used here to normalize N1/N2 “viral load” calculations to RP.

Following this correction, the RP-normalized log “viral load” was then calculated as follows: Log viral load =  $(45 - \text{Normalized N1/N2 Ct value}) / \log_2 10$

## 2. RESULTS

### Subgroup analyses of age and BMI

Of the patients that were <65 years of age, a total of 1 hospitalization or any-cause death by Day 29 was recorded in the bamlanivimab and etesevimab treatment group (0.3% [1/353]), compared with 9 events in the placebo group (4.9% [9/183]) (relative risk [95% CI] = 0.06 [0.01, 0.45],  $p < 0.001$ ).

Of the patients that were  $\geq 65$  years of age, a total of 3 hospitalizations or any-cause deaths by Day 29 were recorded in the bamlanivimab and etesevimab treatment group (1.9% [3/158]), compared with 6 events in the placebo group (8% [6/75]) (relative risk [95% CI] = 0.24 [0.06, 0.92],  $p < 0.05$ ).

Of the patients with a BMI <34.5, a total of 4 hospitalizations or any-cause deaths by Day 29 were recorded in the bamlanivimab and etesevimab treatment group (1.4% [4/278]), compared to 4 events in the placebo group (3.2% [4/124]) (relative risk [95% CI] = 0.45 [0.11, 1.75],  $p > 0.05$ ).

Of the patients with a BMI  $\geq 34.5$ , a total of 0 hospitalizations or any-cause deaths by Day 29 were recorded in the bamlanivimab and etesevimab treatment group (0% [0/222]), compared to 11 events in the placebo group (8.6% [11/128]) (relative risk [95% CI] = 0.00 [0.00, 0.00],  $p < 0.001$ ).

Time to Sustained Symptom Resolution

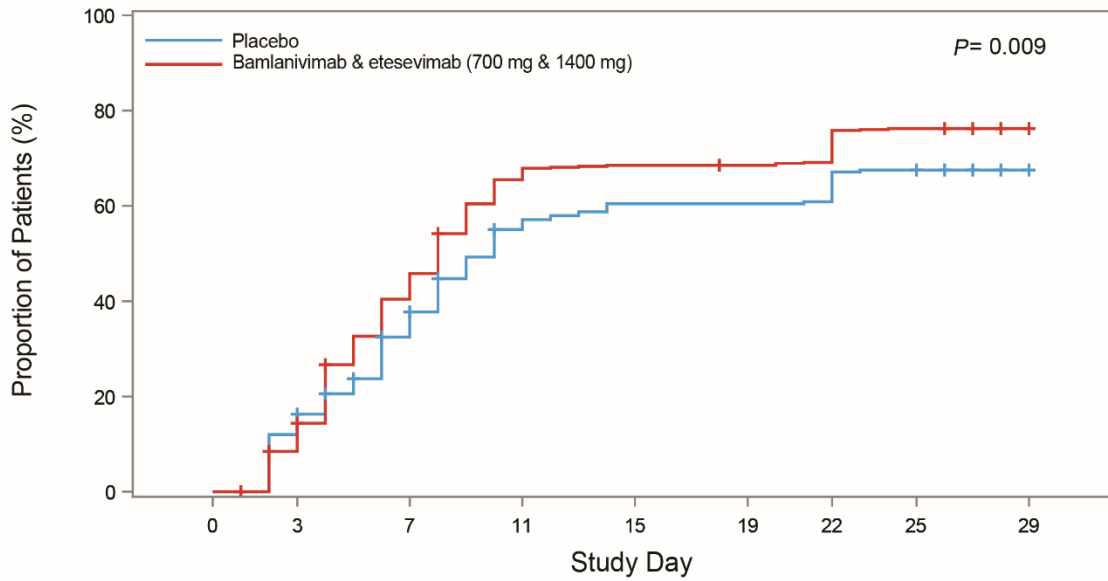

| Time                      | 0        | 3         | 7         | 11      | 15      | 19       | 22      | 25      | 29     |
|---------------------------|----------|-----------|-----------|---------|---------|----------|---------|---------|--------|
| Placebo                   | 258 (42) | 215 (54)  | 152 (47)  | 103 (8) | 95 (0)  | 95 (16)  | 79 (1)  | 77 (0)  | 23 (0) |
| Bamlanivimab & etesevimab | 510 (73) | 432 (158) | 272 (110) | 159 (3) | 156 (0) | 155 (36) | 119 (2) | 117 (0) | 40 (0) |

**Figure S1** Kaplan-Meier analysis of time to first instance of sustained symptom resolution amongst high-risk patients treated with bamlanivimab & etesevimab versus placebo. Sustained symptom resolution was defined as two consecutive assessments with a score of 0 (absent) for shortness of breath, feeling feverish, body aches and pains, sore throat, chills, and headache; and a score of 0 or 1 (absent or mild) for fatigue or cough, for two consecutive assessments. The number of patients at risk are presented below the graph with the number of events occurring after each timepoint, up to and including the next timepoint, in parenthesis. Patients were infused on Study Day 1.

Time to First Symptom Improvement

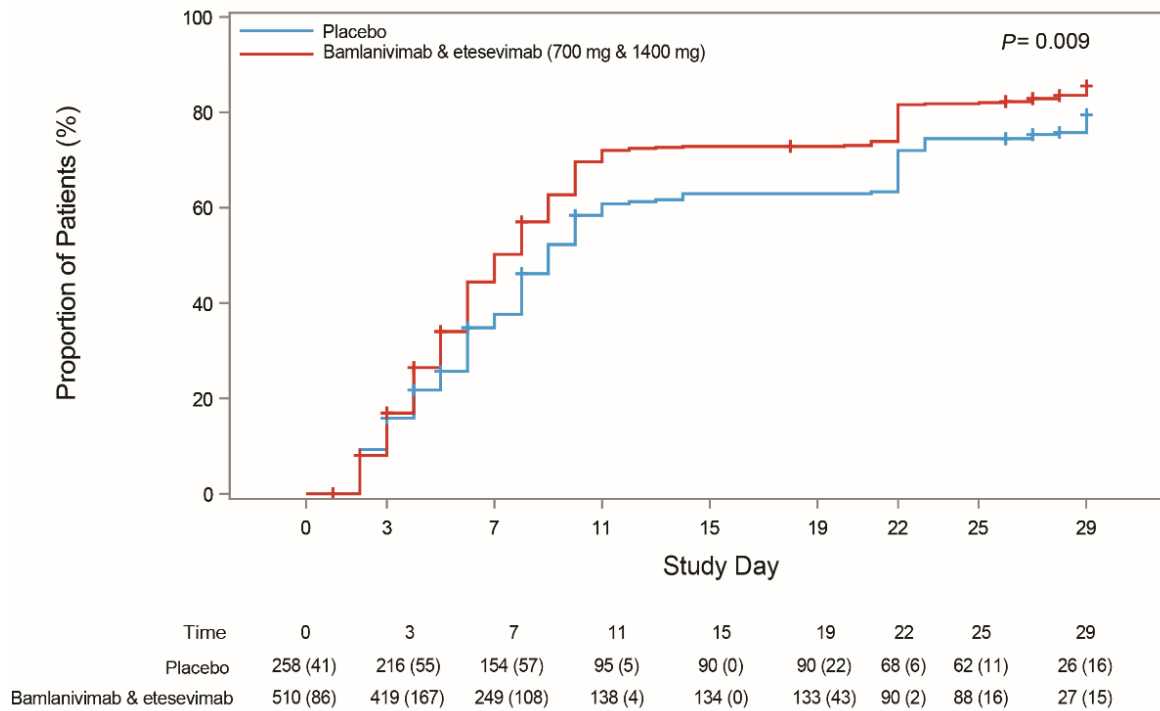

**Figure S2** Kaplan-Meier analysis of time to first symptom improvement amongst high-risk patients treated with bamlanivimab & etesevimab versus placebo. Symptom improvement was defined as symptoms on the symptom questionnaire scored as moderate or severe (2 or 3) at baseline are subsequently scored as mild or absent (1 or 0), and symptoms on the symptom questionnaire scored as mild or absent (1 or 0) at baseline are subsequently scored as absent (0). First symptom improvement was defined as the time the patient first satisfies the definition of symptom improvement. The number of patients at risk are presented below the graph with the number of events occurring after each timepoint, up to and including the next timepoint, in parenthesis. Patients were infused on Study Day 1.



Time to First Symptom Resolution

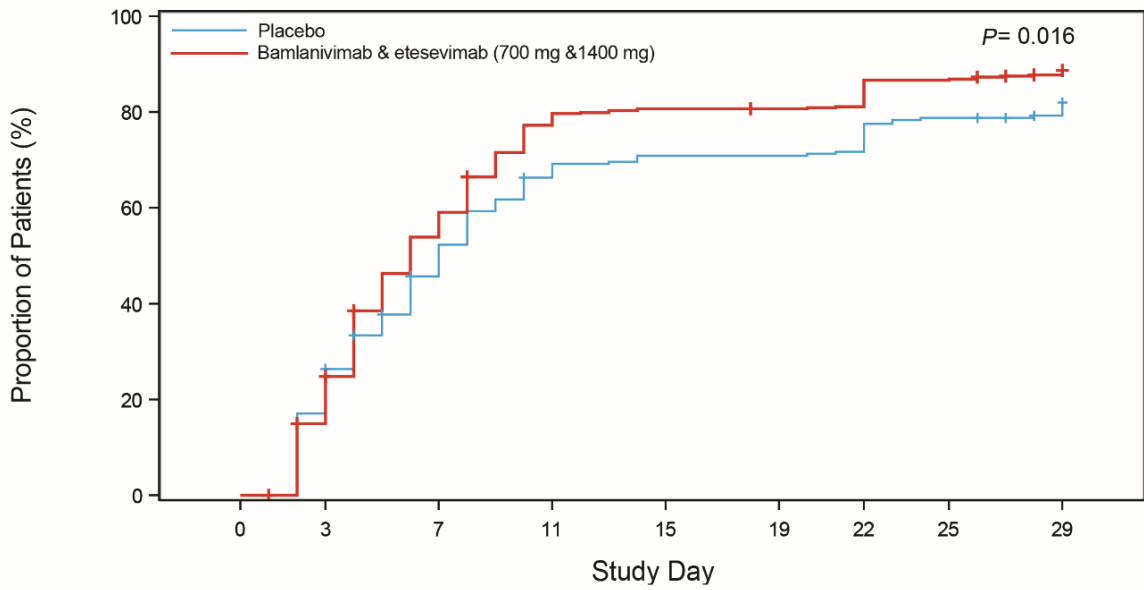

| Time                      | 0         | 3         | 7         | 11      | 15     | 19      | 22     | 25     | 29     |
|---------------------------|-----------|-----------|-----------|---------|--------|---------|--------|--------|--------|
| Placebo                   | 258 (68)  | 189 (65)  | 116 (41)  | 74 (4)  | 70 (0) | 70 (16) | 54 (3) | 51 (7) | 18 (6) |
| Bamlanivimab & etesevimab | 510 (126) | 379 (172) | 205 (102) | 100 (5) | 95 (0) | 94 (29) | 65 (1) | 64 (8) | 20 (4) |

**Figure S3** Kaplan-Meier analysis of time to first symptom resolution amongst high-risk patients treated with bamlanivimab & etesevimab versus placebo. Symptom resolution is defined as a score of 0 (absent) for shortness of breath, feeling feverish, body aches and pains, sore throat, chills, and headache; and a score of 0 or 1 (absent or mild) for cough and fatigue on the symptom questionnaire. Time to first symptomatic resolution is the time the patient first satisfies the definition of symptom resolution. The number of patients at risk are presented below the graph with the number of events occurring after each timepoint, up to and including the next timepoint, in parenthesis. Patients were infused on Study Day 1.

Time to Complete Symptom Resolution

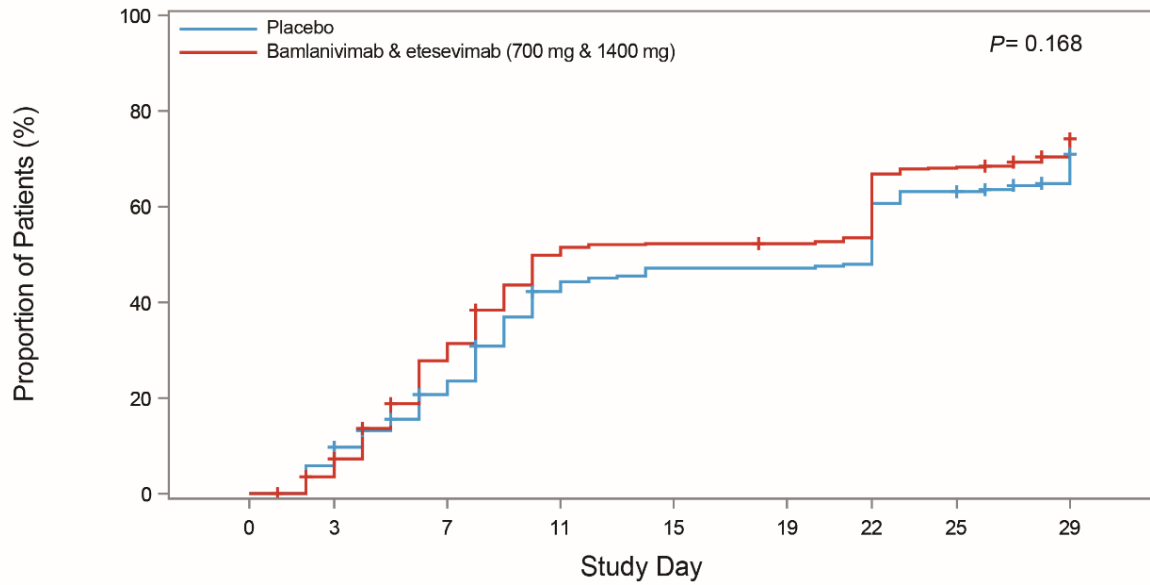

| Time                      | 0        | 3         | 7         | 11      | 15      | 19       | 22      | 25       | 29      |
|---------------------------|----------|-----------|-----------|---------|---------|----------|---------|----------|---------|
| Placebo                   | 258 (25) | 232 (35)  | 189 (51)  | 136 (7) | 129 (0) | 129 (33) | 96 (6)  | 89 (17)  | 35 (20) |
| Bamlanivimab & etesevimab | 510 (37) | 468 (121) | 344 (100) | 241 (4) | 237 (0) | 236 (72) | 164 (7) | 157 (27) | 59 (30) |

**Figure S4** Kaplan-Meier analysis of time to complete symptom resolution amongst high-risk patients treated with bamlanivimab & etesevimab versus placebo. Complete symptom resolution is defined as all symptoms (shortness of breath, feeling feverish, body aches and pains, sore throat, chills, headache, cough, and fatigue) on the symptom questionnaire scored as absent (0). The number of patients at risk are presented below the graph with the number of events occurring after each timepoint, up to and including the next timepoint, in parenthesis. Patients were infused on Study Day 1.

Time to Sustained Complete Symptom Resolution

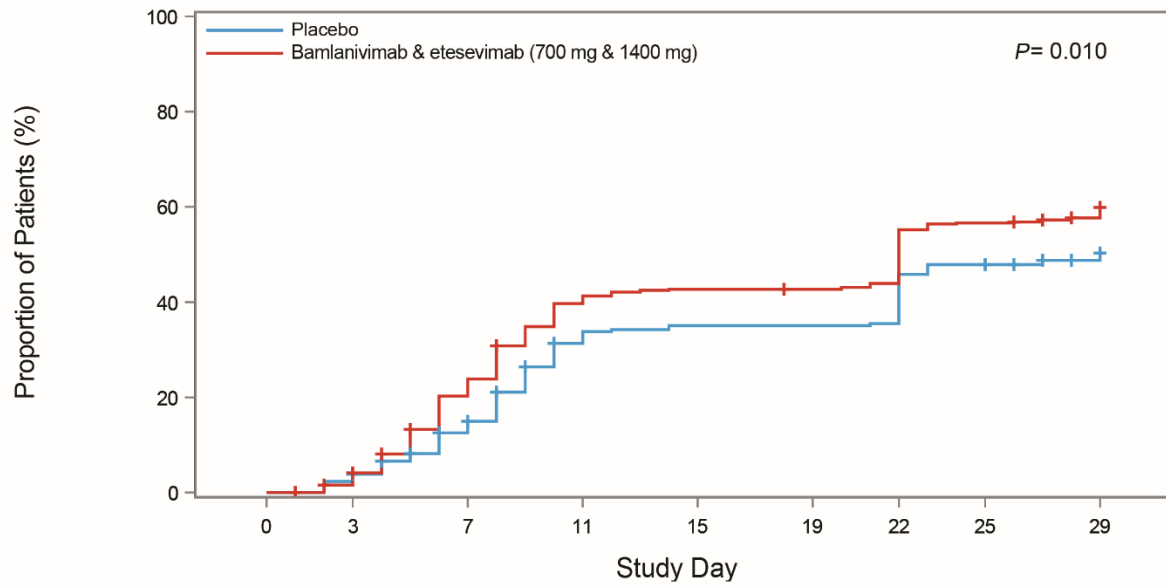

| Time                  | 0        | 3        | 7        | 11      | 15      | 19       | 22      | 25       | 29     |
|-----------------------|----------|----------|----------|---------|---------|----------|---------|----------|--------|
| Placebo               | 258 (10) | 247 (28) | 209 (46) | 160 (3) | 157 (0) | 157 (26) | 131 (5) | 125 (5)  | 33 (3) |
| anivimab & etesevimab | 510 (21) | 484 (99) | 382 (87) | 292 (7) | 285 (0) | 284 (62) | 222 (7) | 215 (14) | 59 (5) |

**Figure S5** Kaplan-Meier analysis of time to sustained complete symptom resolution amongst high-risk patients treated with bamlanivimab & etesevimab versus placebo. Sustained complete symptom resolution is defined as two consecutive assessments with all symptoms (shortness of breath, feeling feverish, body aches and pains, sore throat, chills, headache, cough, and fatigue) on the symptom questionnaire scored as absent (0). The number of patients at risk are presented below the graph with the number of events occurring after each timepoint, up to and including the next timepoint, in parenthesis. Patients were infused on Study Day 1.

Time to SARS-CoV-2 Viral Load Clearance

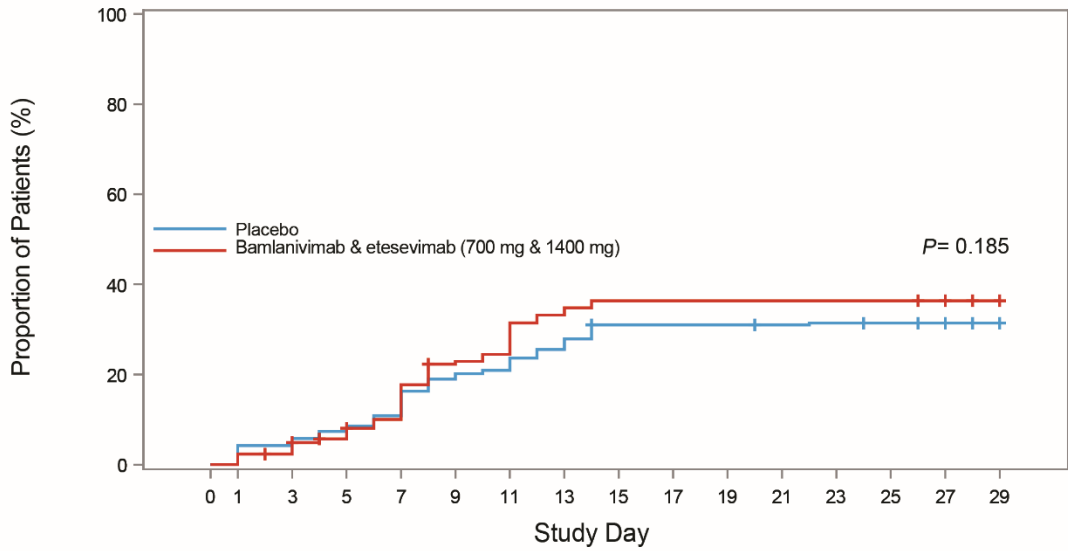

| Time                      | 0        | 1        | 3        | 5        | 7        | 9        | 11       | 13      | 15      | 17      | 19      | 21      | 23      | 25      | 27      | 29     |
|---------------------------|----------|----------|----------|----------|----------|----------|----------|---------|---------|---------|---------|---------|---------|---------|---------|--------|
| Placebo                   | 258 (11) | 247 (4)  | 243 (7)  | 236 (20) | 216 (10) | 206 (9)  | 197 (11) | 186 (8) | 177 (0) | 177 (0) | 177 (0) | 176 (1) | 175 (0) | 174 (0) | 155 (0) | 55 (0) |
| Bamlanivimab & etesevimab | 510 (12) | 498 (13) | 483 (16) | 465 (49) | 416 (26) | 389 (43) | 346 (17) | 329 (8) | 321 (0) | 321 (0) | 321 (0) | 321 (0) | 321 (0) | 321 (0) | 287 (0) | 84 (0) |

**Figure S6** Kaplan-Meier analysis of time to viral clearance amongst high-risk patients treated with bamlanivimab & etesevimab versus placebo. SARS-CoV-2 clearance (yes/no) is defined as two consecutive negative tests for the SARS-CoV-2 virus. The date of viral clearance is defined as the earliest date of the two consecutive negative tests. The number of patients at risk are presented below the graph with the number of events occurring after each timepoint, up to and including the next timepoint, in parenthesis. Patients were infused on Study Day 1.

**Table S1.** Treatment emergent adverse events present in two or more participants in total

|                               | <b>Placebo</b><br>(N=258)<br>n (%) | <b>Bamlanivimab &amp;<br/>Etesevimab</b><br>(N=511)<br>n (%) | <b>Total</b><br>(N=769)<br>n (%) |
|-------------------------------|------------------------------------|--------------------------------------------------------------|----------------------------------|
| <b>TEAEs</b>                  |                                    |                                                              |                                  |
| Liver function test increased | 3 (1.2)                            | 5 (1.0)                                                      | 8 (1.0)                          |
| C-reactive protein increased  | 1 (0.4)                            | 3 (0.6)                                                      | 4 (0.5)                          |
| Dizziness                     | 0                                  | 4 (0.8)                                                      | 4 (0.5)                          |
| Anemia                        | 0                                  | 3 (0.6)                                                      | 3 (0.4)                          |
| Arthralgia                    | 1 (0.4)                            | 2 (0.4)                                                      | 3 (0.4)                          |
| Pruritus                      | 0                                  | 3 (0.6)                                                      | 3 (0.4)                          |
| Rash                          | 2 (0.8)                            | 1 (0.2)                                                      | 3 (0.4)                          |
| Urinary tract infection       | 2 (0.8)                            | 1 (0.2)                                                      | 3 (0.4)                          |
| Anxiety                       | 1 (0.4)                            | 1 (0.2)                                                      | 2 (0.3)                          |
| Asthma                        | 1 (0.4)                            | 1 (0.2)                                                      | 2 (0.3)                          |
| Fall                          | 1 (0.4)                            | 1 (0.2)                                                      | 2 (0.3)                          |
| Gout                          | 1 (0.4)                            | 1 (0.2)                                                      | 2 (0.3)                          |
| Hyperglycemia                 | 0                                  | 2 (0.4)                                                      | 2 (0.3)                          |
| Muscle spasms                 | 1 (0.4)                            | 1 (0.2)                                                      | 2 (0.3)                          |
| Nausea                        | 0                                  | 2 (0.4)                                                      | 2 (0.3)                          |
| Nephrolithiasis               | 0                                  | 2 (0.4)                                                      | 2 (0.3)                          |
| Neutropenia                   | 0                                  | 2 (0.4)                                                      | 2 (0.3)                          |
| Rhinalgia                     | 0                                  | 2 (0.4)                                                      | 2 (0.3)                          |
| Vomiting                      | 1 (0.4)                            | 1 (0.2)                                                      | 2 (0.3)                          |

AE, adverse event; SAE, serious adverse event; TEAE, treatment-emergent adverse event

### **3. BLAZE-1 INVESTIGATORS AND SUPPORT STAFF**

Faisal Amin – Central Valley Research, Modesto, CA  
Masoud Azizad – Valley Clinical Trials Northridge, Northridge, CA  
Katherine Belden – Jefferson Hospital, Philadelphia, PA  
Andra Blomkalns, Stanford University School of Medicine, Palo Alto, CA  
Joseph Boscia – VitaLink, Union, SC  
Yevgeniy Bukhman – Great Lakes Clinical Trialsm Chicago, IL  
Jose Cardona – Indago Research and Health Center, Miami, FL  
Peter Chen – Cedars–Sinai Medical Center, LA, CA  
Paul Cook – Brody School of Medicine, East Carolina Greenville, NC  
Chad Crystal – Eastside Research Associates, Redmond, WA  
Mike Dougan – Mass General Hospital, Boston, MA  
William Fischer – University of North Carolina, Chapel Hill, NC  
Jeffrey Glassberg – Mt. Sinai, New York  
Robert L Gottlieb – Baylor University Medical Center, Dallas, TX, Baylor Scott and White Medical Center – Irving, Irving, TX, Baylor Scott and White All Saints Medical Center, Fort Worth, TX, and Baylor Scott and White Medical Center – Round Rock, Round Rock, TX  
Corey Hebert – NOLA Research Works, New Orleans, LA  
Barry Heller – Long Beach Clinical Trials, Long Beach, CA  
Howard Huang – Houston Methodist, Houston, TX  
Gregory Huhn – John Stroger Jr. Hospital of Cook County, Chicago, IL  
Jeffery Kingsley – iACT Health, Columbus, GA  
Princy Kumar – Georgetown, Washington  
Anuj Malik – St. Johns Ascension, Tulsa, OK  
Carlos Malvestutto – Ohio State University Wexner Medical Center, Columbus, OH  
Patrick Milligan – Community Hospital South, Indianapolis, IN  
Bharat Mocherla – Las Vegas Medical Research, Las Vegas, NV  
Ramesh Mohseni – Catalina Research Institute, Montclair, CA  
Jason Morris – Care Access, Lake Charles, LA  
Ramesh Nathan – Healix, Thousand Oaks, CA  
David Pitrak – University of Chicago Medical, Chicago, IL  
Joshua Purow – Holy Cross, Ft. Lauderdale, FL  
Mayur Ramesh – Henry Ford Hospital, Detroit, MI  
Yessica Sachdeva – Arizona Clinical Trials–Mesa, Mesa, AZ  
Adam Schwartz – Kaiser Permanente, San Diego, CA  
Imad Shawa – Franciscan St Francis Indy, Indianapolis, IN  
Nader Sobh – Smart Cares, Anaheim, CA  
Valentina Stosor – Northwestern University Feinberg School of Medicine, Chicago, IL  
Charles Thompson – VitaLink, Anderson, SC  
Omesh Verma – Crossroads Clinical Research, Victoria, TX  
Erica Kaufman West – Franciscan St Francis Hammond, Hammond, IN  
David Wheeler – Care ID, Fairfax, VA  
Michael Winnie – Coastal Bend Clinical Research, Corpus Christie, TX  
Brian Zeno – Remington Davis, Columbus, OH

#### **Support Staff**

Massachusetts General Hospital, 55 Fruit St, Boston, MA 02114 (Dr. Dougan)

Keri Sullivan

Kathryn Hall

Amiko Uchida M.D.

Valley Clinical Trials Northridge, Northridge, CA, USA (Dr. Azizad)

**Sub Investigators**

Lisa Nakatani FNP  
 Fahed Bitar M.D.  
 Julie Toven CCRP  
 Lisa Nakatani FNP  
 Haydee Gutierrez MPH, CCRP  
 Monica Brown

Thomas Johnson  
 Tayler Flores RN  
 Justin Palarca RN  
 Evelyn Flores LVN  
 Chase Miller  
 Leslie Silva LVN

Las Vegas Medical Research Center, 8530 W Sunset Rd Ste 300, Las Vegas, NV, USA (Dr. Bharat Mocherla)

*Sub investigators*

Dana Forte  
 Del Gardner  
 Beth Moreno

*CRCs cont.*

Tina Martinez  
 Joanna Bachowska  
 Sandra Barcena

*CRCs*

Erlie Lopez  
 Nicole Martini  
 Kelly Beck  
 Jesse Hawkins  
 Valarie Maldonado  
 Lorna Duff

*Pharmacy*

Jane Filus  
 James Fajardo  
 Theresa Reyes  
 Joanna Salvador

*RA*

Damon Murray

Baylor University Medical Center and Baylor Scott and White Research Institute, 3410 Worth St, Suite 250, Dallas, TX, USA (Dr. Gottlieb)

Robert L. Gottlieb, MD, PhD  
 John S. Garrett, MD, MRA, FACEP  
 Marcus Holmes, DO  
 Cedric Spak, MD, MPH  
 Sarah Burris, MHA  
 Rebecca Baker, MSN, RN  
 Solomon Bassett  
 Emily Brock  
 Giselle Carino  
 Laura Clariday  
 Tanqunisha Coleman  
 Allyson Davis  
 Mariana Hurutado-Rodriguez, RN, BSN  
 Allyson Fowlks  
 Nazia Iram  
 Janet Jerrow, PhD  
 Felecia Jones

Tina Jones  
 Kiara Leonard  
 Erica Lusk, CCRP  
 Katalin Martits-Chalangari, MD  
 Chintal Patel, RN, BSN  
 Shannon Perez  
 Noelia Ramirez  
 Raven Robert, MPH  
 Dianna Robinson, LVN  
 Madison Ryan  
 Sydney Scheffler  
 Samantha Villa  
 Samantha Wang, RN, BSN  
 Aaron D. Killian, PharmD, BCPS  
 Adriana Soliz Palacios, MS, PharmD  
 Edilia J. Solis, BS, CPhT

Baylor Scott and White All Saints Medical Center, Fort Worth, TX, USA (Dr. Gottlieb)

Bryan Youree, MD  
 Nathan Albright, DO  
 Asifa Ashraf, MD  
 Abhishek Avirineni, MD  
 Dipesh Bista, MD

Andrew Darwin, DO  
 Sathishkumar Seeliyur Duraiswamy, MD  
 Shovendra Gautam, MD  
 Ezmina Lalani, DO  
 Sherly Mathew, MD

Cheryl McDonald, MD  
Diana Moise, MD  
Jack Ni, DO  
Whitney Nwagbara, MD  
Ijeoma Nwelue, MD  
Aaron Oubre, MD  
Huma Paika, MD  
Vivek Ramarathnam, MD  
Nida Rasheed, MD  
Jacelyn Baldrige  
Sharon Brown

Theresa Cheyne  
Sandra Garcia  
Kristina Perez  
Felicity Vaughan  
Decolia Washington  
Natalia Wiemann  
Elizabeth Berihun, PharmD  
Sierra Mullen, PharmD  
Sunaina Rao, PharmD  
Theresa Yarger, PharmD, BCPS

Baylor Scott and White Medical Center – Irving, Irving, TX, USA (Dr. Gottlieb)

Steven Davis, MD  
Robert Engle, AG–ACNP  
Blake Johnson, MD  
Alyssa Boudreau  
Robin Buckner, LVN, CCRC  
Krizia Duque  
Brittany Garcia  
Jon Thammavong

Mary Wallace  
Julia Cullen, PharmD  
Susan Ferdosian, PharmD  
Hemangini Joshi, PharmD  
Chad Samuelson, PharmD  
Alice Stacey, RPh  
Amy C. Thomas, PharmD

Baylor Scott and White Medical Center – Round Rock, Round Rock, TX, USA (Dr. Gottlieb) and Baylor Scott and White Research Institute, Dallas, TX, USA (Dr. Gottlieb)

MaryAnn Tran MD  
William Tobleman MD  
Nordelle Bent MPH, RN, CPH

Theresa Quezada  
Carmen Sutton  
Emily Zoelle, PharmD

Department of Medicine, Women’s Guild Lung Institute, Cedars–Sinai Medical Center, 8700 Beverly Blvd, Los Angeles, CA (Dr. Chen)

Anders Berg, MD  
Emad Bayoumi, MD  
Antonina Caudill  
Gregg Clapham  
Jeremy Falk, MD  
David Frishberg, MD  
Billy Gellepis  
Lisa Herrera  
Niree Hindoyan  
Carissa Huynh  
Susan Jackman, RN, MS

Harneet Jawanda  
Elizabeth Kissell  
Yuri Matusov, MD  
Shaunt Mehdikhani  
Tanyalak Parimon, MD  
Ethan Pascual  
Victor Tapson, MD  
Sam Torbati, MD  
Tanzira Zaman, MD  
Timothy Wynter

Gadolin Research, Beaumont, TX, USA (Dr. Perry)

*Sub–Investigators*

Joel Ebuh, MD  
Dennisse Galdamez

*CRCs*

Britney Greer  
Deisy Espinoza

*Patient Advocate*

Herman Davis



Long Beach Clinical Trials, 2008 Pacific Ave, Long Beach, CA (Dr. Heller)

|                      |                |
|----------------------|----------------|
| Gina Robles Puthuval | Nayna Paryani  |
| Borady Ven           | Deirdre Heimer |
| Sheila Rosario       | Iyasu, Askalu  |
| Maribel Pantoja      | Ralf Wagner,   |
| Yaakov Deitsch       | Kiery Espinoza |
| Evanne Moux          | Brittany King  |

Vitalink Research, Union, SC, USA (Dr. Boscia)

|                   |                 |
|-------------------|-----------------|
| Meredith Benfield | Carita Barefoot |
| Tara Shetley      | Polly Turner    |

Imperial Health, 501 Dr Michael Debakey Dr, Lake Charles, LA (Dr. Morris)

|                 |              |
|-----------------|--------------|
| Janet Bourque   | Sam Liprie   |
| Melissa Comeaux | Summer Moss  |
| David Guillory  | Page Prather |
| Brandi Ingalls  | Kira Rice    |
| Codie Lee       |              |

Eastside Research Associates, Redmond, WA, USA (Dr. Crystal)

|                      |                                |
|----------------------|--------------------------------|
| Kevin Hanson MD      | Jack O'Donnell                 |
| Javier Nazar MD      | Hillary Thoreson, RN           |
| Ema Burcheci, RN     | Hilda Yousefi                  |
| Pavel Codreanu, MSCR | Gregory Lang, R.Ph, B.S. Pharm |
| Sherry Alboucq, CRCP | Anhaita Jamula, CCRC           |
| Sophia Bixler, RN    | Jenay Hanson, MBA              |
| Mitchell Kennedy     | Kinsey Grey, MPH               |
| Bryan McKay          |                                |

Monroe Biomedical Research, NC, USA (Dr. Igbinadolor)

|                 |                     |
|-----------------|---------------------|
| Krista Gross    | Shalynn Fields      |
| Jennifer Norton | Benjamin Karsai     |
| Suvi Gross      | Syed Mehdi          |
| Maria Carrillo  | Chioma B Ejiogu, NP |

Cook County Health, 2020 W Harrison St, Chicago, IL (Dr. Huhn)

|                 |                  |
|-----------------|------------------|
| Coty Coffee     | Kody Keckler     |
| Stephen Epner   | Karen Kroc       |
| Tracy Everett   | Mark Mycyk       |
| Kimberly Forbes | Robert Needleman |
| Sybil Hosek     | Heather Prescaro |
| Matthew Itterra | Monina Quindipan |

Indago Research and Health Center, FL, USA (Dr. Cardona)

Daniel Pineda  
Karel Reyes

Stanford University School of Medicine, Palo Alto, CA (Dr. Blomkalns)

*Sub-investigator*

Kenton Anderson, MD

*CRCs*

Angelica Pritchard

*Research Manager*  
Leonard Basobas

Franciscan St Francis Indy, Indianapolis, IN (Dr. Shawa)

Kristin Mounce, NP  
Tara Simon, NP  
Stephanie Alford, RN  
Kathleen Kiousopoulos, RN

Tricia Kunz, RN  
Kelly Underwood, RN  
Chanda Beckner

## REFERENCES

- 1 Chen, P. *et al.* SARS-CoV-2 Neutralizing Antibody LY-CoV555 in Outpatients with Covid-19. *N Engl J Med* **384**, 229-237 (2020).
- 2 Center for Disease Control and Prevention. People at Increased Risk And Other People Who Need to Take Extra Precautions. [https://www.cdc.gov/coronavirus/2019-ncov/need-extra-precautions/index.html?CDC\\_AA\\_refVal=https%3A%2F%2Fwww.cdc.gov%2Fcoronavirus%2F2019-ncov%2Fneed-extra-precautions%2Fpeople-at-increased-risk.html](https://www.cdc.gov/coronavirus/2019-ncov/need-extra-precautions/index.html?CDC_AA_refVal=https%3A%2F%2Fwww.cdc.gov%2Fcoronavirus%2F2019-ncov%2Fneed-extra-precautions%2Fpeople-at-increased-risk.html) Accessed on May 24, 2021 (2020).
- 3 Center for Disease Control and Prevention. Clinical Growth Charts. [https://www.cdc.gov/growthcharts/clinical\\_charts.htm](https://www.cdc.gov/growthcharts/clinical_charts.htm), Accessed on July 30, 2021 (2021).
- 4 US Food and Drug Administration. EMERGENCY USE AUTHORIZATION (EUA) SUMMARY LILLY SARS-CoV-2 ASSAY. <https://www.fda.gov/media/140543/download>, Accessed on 24 March, 2021.
- 5 Gottlieb, R. L. *et al.* Effect of Bamlanivimab as Monotherapy or in Combination With Etesevimab on Viral Load in Patients With Mild to Moderate COVID-19: A Randomized Clinical Trial. *JAMA* **325**, 632-644, doi:10.1001/jama.2021.0202 (2021).

|                                            |                         |                |                    |                                           |
|--------------------------------------------|-------------------------|----------------|--------------------|-------------------------------------------|
| Questionnaire obtained by:<br><i>Lilly</i> | Study ID<br>J2W-MC-PYAB | Subject Number | Visit/Cycle Number | Signature of Individual Completing Form   |
|                                            | Investigator Number     | Page 1 of 2    |                    | Date Signed by Individual Completing Form |

1. Assessment Date:

\_\_\_\_\_ (DD/MMM/YYYY)

2. Cough

- Yes
  - Mild
  - Moderate
  - Severe
- No (Absent)

3. Shortness of breath

- Yes
  - Mild
  - Moderate
  - Severe
- No (Absent)

4. Feeling feverish

- Yes
  - Mild
  - Moderate
  - Severe
- No (Absent)

5. Fatigue

- Yes
  - Mild
  - Moderate
  - Severe
- No (Absent)

6. Body aches and pain

- Yes
  - Mild
  - Moderate
  - Severe
- No (Absent)

7. Sore throat

- Yes
  - Mild
  - Moderate
  - Severe
- No (Absent)

|                         |                |                    |             |
|-------------------------|----------------|--------------------|-------------|
| Study ID<br>J2W-MC-PYAB | Subject Number | Visit/Cycle Number | Page 2 of 2 |
|-------------------------|----------------|--------------------|-------------|

8. Chills
- Yes
  - Mild
  - Moderate
  - Severe
  - No (Absent)
9. Loss of appetite
- Yes
  - Mild
  - Moderate
  - Severe
  - No (Absent)
10. Headache
- Yes
  - Mild
  - Moderate
  - Severe
  - No (Absent)
11. Loss of taste
- Yes
  - No
12. Loss of smell
- Yes
  - No
13. Overall, how bad are your symptoms TODAY (check one)?
- No symptoms
  - Mild
  - Moderate
  - Severe
  - Very severe
14. Overall, how is your general physical health TODAY (check one)?
- Poor
  - Fair
  - Good
  - Very good
  - Excellent
15. Have you returned to your usual (pre-COVID) health today (check one)?
- Yes
  - No
